# Supplementary material for: Disentangling LiDAR Contribution in Modelling Species–Habitat Structure Relationships in Terrestrial Ecosystems Worldwide. A Systematic Review and Future Directions
Source: MDPI journal article supplement (doi:10.3390/rs13173447), 2021-08-30
Supplement: s1 [file s1]

## SUPPLEMENTARY MATERIAL

**Table S1:** Number of papers found in the literature search for the period 2000-2020 according to the keyword strings and the databases used, filtered and selected. Note that no article published before 2000 was retrieved using search strings.

| Keyword string            | ISI WOK |          |          | SCOPUS |          |          |
|---------------------------|---------|----------|----------|--------|----------|----------|
|                           | Search  | Filtered | Selected | Search | Filtered | Selected |
| LiDAR* AND biodiversity*  | 648     | 317      | 62       | 380    | 216      | 48       |
| LiDAR* AND vertebrates*   | 853     | 23       | 18       | 13     | 12       | 12       |
| LiDAR* AND mammals*       | 592     | 28       | 25       | 25     | 22       | 16       |
| LiDAR* AND birds*         | 229     | 87       | 75       | 122    | 126      | 68       |
| LiDAR* AND reptiles*      | 32      | 4        | 3        | 4      | 3        | 2        |
| LiDAR* AND amphibians*    | 5       | 4        | 2        | 5      | 3        | 2        |
| LiDAR* AND invertebrates* | 254     | 9        | 2        | 13     | 11       | 1        |
| LiDAR* AND insects*       | 138     | 43       | 9        | 104    | 86       | 7        |
| LiDAR* AND fungi*         | 41      | 10       | 1        | 12     | 9        | 3        |
| LiDAR* AND lichens*       | 9       | 3        | 3        | 7      | 3        | 3        |
| LiDAR* AND bryophytes*    | 15      | 5        | 5        | 16     | 8        | 5        |
| Total                     | 2816    | 533      | 205      | 701    | 499      | 167      |

**Table S2:** List of species recorded in each of the 173 articles reviewed. #: more than 20 species recorded; N/A: data not available.

| Birds           |                                                 |                                                                                                                                      |                                                                                            |
|-----------------|-------------------------------------------------|--------------------------------------------------------------------------------------------------------------------------------------|--------------------------------------------------------------------------------------------|
| Order           | Common name                                     | Scientific name                                                                                                                      | Reference                                                                                  |
| Charadriiformes | Eastern hooded plover                           | <i>Thinornis cucullatus cucullatus</i>                                                                                               | Ehmke et al. 2016                                                                          |
| Charadriiformes | Marbled murrelet                                | <i>Brachyramphus marmoratus</i>                                                                                                      | Hagar et al. 2014                                                                          |
| Galliformes     | Capercaillie                                    | <i>Tetrao urogallus</i>                                                                                                              | Graf et al. 2009, Milanese et al. 2017, Glad et al. 2020                                   |
| Galliformes     | Capercaillie, hazel grouse                      | <i>Tetrao urogallus</i> , <i>Tetrastes bonasia</i>                                                                                   | Vauhkonen & Imponen, 2016, Kortmann et al. 2018(a)                                         |
| Galliformes     | Hazel grouse                                    | <i>Tetrastes bonasia</i>                                                                                                             | Bae et al.2014, Zellweger et al. 2014                                                      |
| Galliformes     | Greater sage-grouse                             | <i>Centrocercus urophasianus</i>                                                                                                     | Zabihi et al. 2019                                                                         |
| Passeriformes   | Eurasian sky lark                               | <i>Alauda arvensis</i>                                                                                                               | Mason et al. 2003                                                                          |
| Passeriformes   | Eurasian sky lark, great tit, Eurasian blue tit | <i>Alauda arvensis</i> , <i>Parus major</i> , <i>Cyanistes caeruleus</i>                                                             | Bradbury et al. 2005                                                                       |
| Passeriformes   | Salt-marsh sparrow                              | <i>Ammodramus caudacutus</i>                                                                                                         | Meiman et al. 2012                                                                         |
| Passeriformes   | Brown creeper                                   | <i>Certhia americana</i>                                                                                                             | Vogeler et al. 2013, Vierling et al 2014                                                   |
| Passeriformes   | Wood thrush                                     | <i>Hylocichla mustelina</i>                                                                                                          | Jirinec et al. 2016                                                                        |
| Passeriformes   | Red-backed shrike                               | <i>Lanius collurio</i>                                                                                                               | Svendsen et al 2015                                                                        |
| Passeriformes   | Great tit                                       | <i>Parus major</i>                                                                                                                   | Hinsley et al. 2006, Hill & Hinsley, 2015                                                  |
| Passeriformes   | Great tit, Eurasian blue tit                    | <i>Parus major</i> , <i>Cyanistes caeruleus</i>                                                                                      | Hinsley et al. 2002, Hinsley et al. 2008, Hinsley et al. 2009(a), Redhead et al 2013       |
| Passeriformes   | Siberian jay                                    | <i>Perisoreus infaustus</i>                                                                                                          | Klein et al. 2020                                                                          |
| Passeriformes   | Wood warbler                                    | <i>Phylloscopus sibilatrix</i>                                                                                                       | Huber et al 2016, Huber et al. 2017                                                        |
| Passeriformes   | Wood warbler                                    | <i>Phylloscopus trochilus</i>                                                                                                        | Bellamy et al 2009                                                                         |
| Passeriformes   | Marsh tit                                       | <i>Poecile palustris</i>                                                                                                             | Broughton et al. 2006, Broughton et al. 2012a Broughton et al. 2012b Broughton et al. 2014 |
| Passeriformes   | Black-throated blue warbler                     | <i>Setophaga caerulescens</i>                                                                                                        | Goetz et al. 2010                                                                          |
| Passeriformes   | Cerulean warbler                                | <i>Setophaga cerulea</i>                                                                                                             | Barnes et al. 2006                                                                         |
| Passeriformes   | Dark-eyed junco, warbling vireo                 | <i>Junco hyemalis</i> , <i>Vireo gilvus</i>                                                                                          | Clawges et al. 2008                                                                        |
| Passeriformes   | Eurasian black cap, Common chaffinch            | <i>Sylvia atricapilla</i> , <i>Fringilla coelebs</i>                                                                                 | Renner et al. 2016                                                                         |
| Passeriformes   | Lapland longspur, white-crowned Sparrow         | <i>Calcarius lapponicus</i> , <i>Zonotrichia leucophrys</i>                                                                          | Boelman et al 2016                                                                         |
| Passeriformes   | Several species                                 | <i>Regulus regulus</i> , <i>Phylloscopus trochilus</i> , <i>Fringilla coelebs</i> , <i>Erithacus rubecula</i> , <i>Parus major</i> , | Eldegard et al. 2016                                                                       |

|               |                                  |                                                                                                                                                                                                                                                      |                                                                                                                                      |
|---------------|----------------------------------|------------------------------------------------------------------------------------------------------------------------------------------------------------------------------------------------------------------------------------------------------|--------------------------------------------------------------------------------------------------------------------------------------|
|               |                                  | <i>Anthus trivialis</i> , <i>Troglodytes troglodytes</i> , <i>Carduelis spinus</i>                                                                                                                                                                   |                                                                                                                                      |
| Passeriformes | Several species                  | <i>Alauda arvensis</i> , <i>Anthus pratensis</i> , <i>A. trivialis</i> , <i>Saxicola rubicola</i> , <i>Turdus philomelos</i> , <i>Lophophanes cristatus</i> , <i>Certhia brachydactyla</i> , <i>Carduelis cannabina</i> , <i>Emberiza citrinella</i> | Ficetola et al. 2014                                                                                                                 |
| Passeriformes | Several species                  | <i>Setophaga striata</i> , <i>S. caerulescens</i> , <i>S. magnolia</i> , <i>S. coronata</i> , <i>Seiurus aurocapilla</i> , <i>Vireo olivaceus</i> , <i>Junco hyemalis</i> , <i>Empidonax flaviventris</i>                                            | Swatantran et al. 2012                                                                                                               |
| Passeriformes | Several species                  | <i>Setophaga striata</i> , <i>S. caerulescens</i> , <i>S. magnolia</i> , <i>S. coronata</i> , <i>Seiurus aurocapilla</i> , <i>Vireo olivaceus</i> , <i>Junco hyemalis</i> , <i>Empidonax flaviventris</i>                                            | Seavy et al. 2009                                                                                                                    |
| Passeriformes | Several species                  | <i>Hemignathus virens</i> , <i>Himatione sanguinea</i> , <i>Myadestes obscurus</i> , <i>Zosterops japonicus</i> , <i>Garrulax canorus</i>                                                                                                            | Boelman et al. 2007                                                                                                                  |
| Passeriformes | Several species                  | #                                                                                                                                                                                                                                                    | Müller et al. 2009, Sasaki et al. 2016                                                                                               |
| Piciformes    | Red-cockaded woodpecker          | <i>Leuconotopicus borealis</i>                                                                                                                                                                                                                       | Smart et al. 2012, Trainor et al. 2013, Garabedian et al. 2014, Garabedian et al 2017, Garabedian et al 2018, Garabedian et al. 2020 |
| Piciformes    | Lewis's woodpecker               | <i>Melanerpes lewis</i>                                                                                                                                                                                                                              | Vogeler et al. 2016                                                                                                                  |
| Piciformes    | Black-backed woodpecker          | <i>Picoides arcticus</i>                                                                                                                                                                                                                             | Casas et al. 2016                                                                                                                    |
| Piciformes    | Three-toed woodpecker            | <i>Picoides tridactylus</i>                                                                                                                                                                                                                          | Zielewska et al. 2018                                                                                                                |
| Piciformes    | Red-naped sapsucker              | <i>Sphyrapicus nuchalis</i>                                                                                                                                                                                                                          | Vierling et al. 2013                                                                                                                 |
| Strigiformes  | Northern spotted owl             | <i>Strix occidentalis caurina</i>                                                                                                                                                                                                                    | Sovern et al. 2019, Hagar et al. 2020                                                                                                |
| Strigiformes  | Northern spotted owl, barred owl | <i>Strix occidentalis caurina</i> , <i>Strix varia</i>                                                                                                                                                                                               | Jenkins et al 2019, Mangan et al. 2019                                                                                               |
| Strigiformes  | California spotted owl           | <i>Strix occidentalis occidentalis</i>                                                                                                                                                                                                               | Garcia-Feced et al. 2011, North et al. 2017, Gallagher et al. 2019                                                                   |
| Several       | Several species                  | <i>Pavo muticus</i> , <i>Treron phayrei</i> , <i>Psitta culaeupatria</i> , <i>P. ularoseata</i> , <i>Ploceus hypoxanthus</i> , <i>Polihierax insignis</i> , <i>Picus rabieri</i>                                                                     | Singh et al. 2017                                                                                                                    |
| Several       | Several species                  | <i>Catharus ustulatus</i> , <i>Geothlypis tolmiei</i> , <i>Oreothlypis celata</i> , <i>Empidonax oberholseri</i> , <i>Leuconotopicus villosus</i> , <i>Colaptes auratus</i> , <i>Sitta canadensis</i> , <i>Poecile gambeli</i>                       | Lorenz et al. 2015                                                                                                                   |
| Several       | Several species                  | <i>Tetrao urogallus</i> , <i>Tetrastes bonasia</i> , <i>Picoides tridactylus</i> , <i>Glaucidium passerinum</i>                                                                                                                                      | Zellweger et al. 2013                                                                                                                |

|         |                 |                                                                                                                                                                                                                                          |                                                                                                                                                                                                                                                                                                                                                                                                                                                                              |
|---------|-----------------|------------------------------------------------------------------------------------------------------------------------------------------------------------------------------------------------------------------------------------------|------------------------------------------------------------------------------------------------------------------------------------------------------------------------------------------------------------------------------------------------------------------------------------------------------------------------------------------------------------------------------------------------------------------------------------------------------------------------------|
| Several | Several species | <i>Parus major, Poecile montanus, P. palustris, Sitta europea, Periparus ater, Cyanistes caeruleus, Garrulus glandarius, Lophophane cristatus, Dendrocopos major, Fringilla coelebs, Pyrrhula pyrrhula</i>                               | Renner et al. 2012                                                                                                                                                                                                                                                                                                                                                                                                                                                           |
| Several | Several species | <i>Laniu scollurio, Crex crex, Otus scops, Picus viridis</i>                                                                                                                                                                             | Tattoni et al. 2012                                                                                                                                                                                                                                                                                                                                                                                                                                                          |
| Several | Several species | <i>Anous minutus, A. stolidus, Onychoprion lunatus, Gygis alba, Fregata minor, Sula dactylatra, S. sula, Phaethon rubricauda</i>                                                                                                         | Hatfield et al. 2012                                                                                                                                                                                                                                                                                                                                                                                                                                                         |
| Several | Several species | <i>Himatione sanguinea, Chlorodrepanis virens, Myadestes obscurus, Drepanis coccinea, Chasiempis sandwichensis, Zosterops japonicus, Haemorhous mexicanus, Leiothrix lutea, Garrulax canorus, Buteo solitarius, Lophura leucomelanos</i> | Flaspohler et al. 2010                                                                                                                                                                                                                                                                                                                                                                                                                                                       |
| Several | Several species | <i>Empidonax oberholseri, Leuconotopicus villosus, Melanerpes lewis, Dryobates pubescens</i>                                                                                                                                             | Martinuzzi et al. 2009                                                                                                                                                                                                                                                                                                                                                                                                                                                       |
| Several | Several species | <i>Anthus trivialis, Fringilla coelebs, Phylloscopus trochilus, Pluvialis apricaria, Tringa totanus, T. glareola, Vanellus vanellus, Anthus pratensis, Alauda arvensis</i>                                                               | Leivits&Leivits, 2009                                                                                                                                                                                                                                                                                                                                                                                                                                                        |
| Several | Several species | #                                                                                                                                                                                                                                        | Goetz et al. 2007<br>Hinsley et al. 2009(b),<br>Müller et al. 2010,<br>Lesak et al. 2011,<br>Jones et al. 2013,<br>Young et al. 2013,<br>Goetz et al 2014,<br>Vogeler et al. 2014,<br>Weisberg et al. 2014,<br>Vihervaara et al. 2015, Wallis et al. 2016, Swift et al. 2017,<br>Bae et al. 2018,<br>Melin et al. 2018,<br>Mononen et al. 2018,<br>Kellner et al. 2018,<br>Adams & Matthews, 2019,<br>Melin et al. 2019<br>Khanaposhtani et al. 2019,<br>Taillie et al. 2019 |
| Several | Several species | N/A                                                                                                                                                                                                                                      | Davenport et al. 2000,<br>Coops et al. 2016,<br>Carrasco et al. 2019                                                                                                                                                                                                                                                                                                                                                                                                         |
|         |                 |                                                                                                                                                                                                                                          |                                                                                                                                                                                                                                                                                                                                                                                                                                                                              |

| Mammals      |                                                  |                                                                                                                                                                                                     |                                                         |
|--------------|--------------------------------------------------|-----------------------------------------------------------------------------------------------------------------------------------------------------------------------------------------------------|---------------------------------------------------------|
| Chiroptera   | Western barbastelle                              | <i>Barbastella barbastellus</i>                                                                                                                                                                     | Carr et al. 2018, Kortmann et al. 2018 (b)              |
| Chiroptera   | Several species                                  | N/A                                                                                                                                                                                                 | Lacki et al 2017                                        |
| Chiroptera   | Several species                                  | <i>Myotis</i> spp., <i>Plecotus</i> spp., <i>Pipistrellus</i> spp., <i>Hypsugos</i> avii, <i>Eptesicus</i> spp., <i>Nyctalus</i> spp., <i>Vespertilio murinus</i>                                   | Froidevaux et al. 2016                                  |
| Chiroptera   | Several species                                  | <i>Pipistrellus</i> spp., <i>Vespertilio</i> spp., <i>Eptesicus</i> spp., <i>Nyctalus</i> spp., <i>Myotis</i> spp.                                                                                  | Müller et al. 2013                                      |
| Chiroptera   | Several species                                  | <i>Pipistrellus pygmaeus</i> , <i>P. nathusii</i> , <i>P. pipistrellus</i> , <i>Myotis</i> sp., <i>Plecotus</i> sp., <i>Barbastella barbastellus</i> , <i>Nyctalus leisleri</i> , <i>N. noctula</i> | Jung et al. 2012                                        |
| Artiodactyla | White-tailed deer                                | <i>Odocoileus virginianus</i>                                                                                                                                                                       | Kroeger et al. 2020                                     |
| Artiodactyla | Mule deer                                        | <i>Odocoileus hemionus</i>                                                                                                                                                                          | Coops et al. 2010                                       |
| Artiodactyla | Several species                                  | <i>Odocoileus</i> spp., <i>Cervus canadensis</i>                                                                                                                                                    | Hull et al. 2019                                        |
| Artiodactyla | Moose                                            | <i>Alces alces</i>                                                                                                                                                                                  | Melin et al. 2013, Melin et al. 2014, Melin et al. 2016 |
| Artiodactyla | European roe deer                                | <i>Capreolus capreolus</i>                                                                                                                                                                          | Ewald et al. 2014, Lone et al. 2014                     |
| Artiodactyla | Sable antelope                                   | <i>Hippotragus niger</i>                                                                                                                                                                            | Asner et al 2015                                        |
| Artiodactyla | Migratory woodland caribou                       | <i>Rangifer tarandus caribou</i>                                                                                                                                                                    | Finnegan et al. 2018                                    |
| Carnivora    | Pacific marten                                   | <i>Martes caurina</i>                                                                                                                                                                               | Tweedy et al. 2019                                      |
| Carnivora    | Fisher                                           | <i>Pekania pennanti</i>                                                                                                                                                                             | Zhao et al. 2012, Blomdahl et al. 2019                  |
| Carnivora    | Jaguar                                           | <i>Panthera onca</i>                                                                                                                                                                                | de Thoisy et al. 2016                                   |
| Carnivora    | Lion                                             | <i>Panthera leo</i>                                                                                                                                                                                 | Loarie et al. 2013, Davies et al 2016(a)                |
| Carnivora    | Several species                                  | <i>Lycalopexculpaes</i> , <i>Lycalopexgriseus</i> , <i>Lycalopexfulvipes</i> , <i>Leopardusguigna</i>                                                                                               | Moreira-Arce et al. 2016                                |
| Lagomorpha   | Snowshoe hare                                    | <i>Lepusamericanus</i>                                                                                                                                                                              | Kawaguchi &Desrochers, 2017                             |
| Lagomorpha   | New England cottontail                           | <i>Sylvilagustransitionalis</i>                                                                                                                                                                     | Amaral et al. 2016                                      |
| Primates     | Gray's bald-faced saki                           | <i>Pithecia irrorata</i>                                                                                                                                                                            | Palminteri et al. 2012                                  |
| Primates     | Bornean orangutan                                | <i>Pongo pygmaeus</i>                                                                                                                                                                               | Davies et al. 2019, Seaman et al. 2019                  |
| Primates     | Bornean white-bearded gibbon, maroon leaf monkey | <i>Hylobates albibarbis</i> , <i>Presbytis rubicunda</i>                                                                                                                                            | Singh et al. 2018                                       |
| Primates     | Several species                                  | <i>Alouatta palliata</i> , <i>Ateles geoffroyi</i> , <i>Cebus capucinus</i> ,                                                                                                                       | McLean et al. 2016                                      |
| Rodentia     | Wood mouse                                       | <i>Apodemus sylvaticus</i>                                                                                                                                                                          | Jaime-Gonzalez et al. 2017                              |
| Rodentia     | Red tree vole                                    | <i>Arborimus longicaudus</i>                                                                                                                                                                        | Linnell et al. 2017                                     |
| Rodentia     | Hazel dormouse                                   | <i>Muscardinus avellanarius</i>                                                                                                                                                                     | Goodwin et al. 2018                                     |
| Rodentia     | Delmarva fox squirrel                            | <i>Sciurus nigercinereus</i>                                                                                                                                                                        | Nelson et al. 2005                                      |
| Rodentia     | Red squirrel                                     | <i>Sciurus vulgaris</i>                                                                                                                                                                             | Flaherty et al. 2014                                    |
| Rodentia     | Douglas squirrel, American red squirrel          | <i>Tamiasciurus douglasii</i> , <i>T. hudsonicus</i>                                                                                                                                                | Fotis et al. 2020                                       |
| Rodentia     | American red squirrel                            | <i>Tamiasciurus hudsonicus</i>                                                                                                                                                                      | Hatten, 2014                                            |

|                      |                          |                                                                                                                                                                                                                                                                                                                                                                       |                                                           |
|----------------------|--------------------------|-----------------------------------------------------------------------------------------------------------------------------------------------------------------------------------------------------------------------------------------------------------------------------------------------------------------------------------------------------------------------|-----------------------------------------------------------|
| Several              | Several species          | <i>Blarina brevicauda</i> , <i>Glaucomys</i> sp., <i>Microtus pennsylvanicus</i> , <i>Myodes gapperi</i> , <i>Napaeozapus insignis</i> , <i>Peromyscus leucopus</i> , <i>Peromyscus maniculatus</i> , <i>Sorex arcticus</i> , <i>S. cinereus</i> , <i>S. hoyi</i> , <i>Tamias minimus</i> , <i>T. striatus</i> , <i>T. ciurus hudsonicus</i> , <i>Zapus hudsonius</i> | Schooler et al. 2019                                      |
| Several              | Several species          | <i>Panthera leo</i> , <i>Tragelaphus strepsiceros</i> , <i>T. oryx</i> , <i>Syncerus caffer</i> , <i>Equus quagga</i> , <i>Alcelaphus buselaphus</i>                                                                                                                                                                                                                  | Davies et al. 2016 (b)                                    |
| <b>Invertebrates</b> |                          |                                                                                                                                                                                                                                                                                                                                                                       |                                                           |
| Blattodea            | Termites                 | <i>Macrotermes</i> spp.                                                                                                                                                                                                                                                                                                                                               | Levick et al 2010, Davies et al. 2014, Davies et al. 2016 |
| Coleoptera           | Beetles                  | <i>Agonum retractum</i> , <i>Calathu singratus</i> , <i>Platynus decentis</i> , <i>Pterostichus adstrictus</i> , <i>P. coracinus</i> , <i>P. pennsylvanicus</i> , <i>Sphaeroderus nitidicollis</i> , <i>Synuchus impunctatus</i>                                                                                                                                      | Work et al. 2011                                          |
| Coleoptera           | Ground beetles           | #                                                                                                                                                                                                                                                                                                                                                                     | Bombi et al. 2019                                         |
| Coleoptera           | Saproxyllic beetles      | #                                                                                                                                                                                                                                                                                                                                                                     | Gossner et al. 2016, Seibold et al. 2017                  |
| Coleoptera           | Beetles                  | #                                                                                                                                                                                                                                                                                                                                                                     | Müller et al. 2009 (b)                                    |
| Hemiptera            | Wēkiu bug                | <i>Nysius wekiuicola</i>                                                                                                                                                                                                                                                                                                                                              | Stephenson et al. 2017                                    |
| Lepidoptera          | Several species          | <i>Coenonympha tullia</i> , <i>Celastrina ladon</i> , <i>Cupido amyntula</i> , <i>Vanessa cardui</i>                                                                                                                                                                                                                                                                  | Hess et al. 2013                                          |
| Lepidoptera          | Several species          | #                                                                                                                                                                                                                                                                                                                                                                     | Aguirre-Gutierrez et al. 2017                             |
| Araneae              | Spiders                  | #                                                                                                                                                                                                                                                                                                                                                                     | Vierling et al. 2011                                      |
| Decapoda             | Red swamp crayfish       | <i>Procambarus clarkii</i>                                                                                                                                                                                                                                                                                                                                            | Paulson & Martin, 2014                                    |
| Ostreida             | Eastern oyster           | <i>Crassostrea virginica</i>                                                                                                                                                                                                                                                                                                                                          | Hogan & Reidenbach, 2019                                  |
| Several              | Several species          | N/A                                                                                                                                                                                                                                                                                                                                                                   | Kerfoot et al. 2019                                       |
| Several              | Arthropods               | #                                                                                                                                                                                                                                                                                                                                                                     | Müller et al. 2018, Müller et al. 2014                    |
| Several              | Snails                   | #                                                                                                                                                                                                                                                                                                                                                                     | Zellweger et al. 2015                                     |
| <b>Reptiles</b>      |                          |                                                                                                                                                                                                                                                                                                                                                                       |                                                           |
| Crocodylia           | Saltwater crocodile      | <i>Crocodylus porosus</i>                                                                                                                                                                                                                                                                                                                                             | Evans et al. 2017                                         |
| Squamata             | Several species          | <i>Lacerta schreiberi</i> , <i>Timon lepidus</i> , <i>Podarcis bocagei</i> , <i>P. hispanica</i>                                                                                                                                                                                                                                                                      | Sillero & Goncalves-Seco, 2014                            |
| Testudines           | Kemp's ridley sea turtle | <i>Lepidochelys kempii</i>                                                                                                                                                                                                                                                                                                                                            | Culver et al. 2020                                        |
| Testudines           | Greek tortoise           | <i>Testudo graeca</i>                                                                                                                                                                                                                                                                                                                                                 | Bernheim et al. 2019                                      |
| <b>Amphibians</b>    |                          |                                                                                                                                                                                                                                                                                                                                                                       |                                                           |

|                                                        |                                 |                                                                                                                                                                                                                                                                                                                                                                                                                                                        |                                                       |
|--------------------------------------------------------|---------------------------------|--------------------------------------------------------------------------------------------------------------------------------------------------------------------------------------------------------------------------------------------------------------------------------------------------------------------------------------------------------------------------------------------------------------------------------------------------------|-------------------------------------------------------|
| Several                                                | Several species                 | N/A                                                                                                                                                                                                                                                                                                                                                                                                                                                    | Julian et al. 2009, Wu et al. 2014, Riley et al. 2017 |
| <b>Bryophytes, lichens &amp; fungi</b>                 |                                 |                                                                                                                                                                                                                                                                                                                                                                                                                                                        |                                                       |
| Several                                                | Bryophytes                      | <i>Sphagnum</i> spp.                                                                                                                                                                                                                                                                                                                                                                                                                                   | Korpela et al. 2020                                   |
| Several                                                | Bryophytes                      | <i>Campylophyllum hispidulum</i> , <i>Chiloscyphus pallescens</i> , <i>Lophocolea heterophylla</i> , <i>Plagiomnium drummondii</i> , <i>Scapani aglaucocephala</i> , <i>Pleurozium schreberi</i> , <i>Hylocomium splendens</i> , <i>Aulacomnium palustre</i> , <i>Thuidium recognitum</i> , <i>Brachythecium campestre</i> , <i>Orthotrichum speciosum</i> , <i>Pylaisia polyantha</i> , <i>Ptilidium pulcherrimum</i> , <i>Dicranum fragilifolium</i> | Bartels et al. 2018                                   |
| Several                                                | Bryophytes                      | <i>Sphagnum</i> spp., <i>Pleurozium</i> spp., <i>Hylocomium</i> spp.                                                                                                                                                                                                                                                                                                                                                                                   | Peckham et al. 2009                                   |
| Several                                                | Bryophytes                      | <i>Pleurozium schreberi</i> , <i>Hylocomium splendens</i> , <i>Sphagnum girgensohnii</i> , <i>Polytrichum commune</i>                                                                                                                                                                                                                                                                                                                                  | Kristensen et al. 2015                                |
| Several                                                | Lichens                         | <i>Cladonia</i> & <i>Cetraria</i> spp                                                                                                                                                                                                                                                                                                                                                                                                                  | Keim et al. 2017                                      |
| Several                                                | Lichens (Biological soil crust) | N/A                                                                                                                                                                                                                                                                                                                                                                                                                                                    | Rodriguez-Caballero et al. 2019                       |
| Several                                                | Fungi                           | #                                                                                                                                                                                                                                                                                                                                                                                                                                                      | Peura et al. 2016, Thers et al. 2017                  |
| Several                                                | Several species                 | N/A                                                                                                                                                                                                                                                                                                                                                                                                                                                    | Langford et al. 2016, Moeslund et al. 2019            |
| <b>Several taxonomic groups</b>                        |                                 |                                                                                                                                                                                                                                                                                                                                                                                                                                                        |                                                       |
| Birds, bats, mammals, amphibians                       |                                 | Cooper et al. 2020                                                                                                                                                                                                                                                                                                                                                                                                                                     |                                                       |
| Birds, bats, invertebrates, bryophytes, lichens, fungi |                                 | Bae et al. 2019                                                                                                                                                                                                                                                                                                                                                                                                                                        |                                                       |
| Birds, mammals (bats)                                  |                                 | Renner et al. 2018                                                                                                                                                                                                                                                                                                                                                                                                                                     |                                                       |
| Birds, invertebrates (butterflies)                     |                                 | Zellweger et al. 2017                                                                                                                                                                                                                                                                                                                                                                                                                                  |                                                       |
| Birds, invertebrates (insects)                         |                                 | Zellweger et al. 2016                                                                                                                                                                                                                                                                                                                                                                                                                                  |                                                       |
| Birds, invertebrates (beetles)                         |                                 | Lindberg et al. 2015                                                                                                                                                                                                                                                                                                                                                                                                                                   |                                                       |
| Birds, mammals, amphibians                             |                                 | Roll et al. 2015                                                                                                                                                                                                                                                                                                                                                                                                                                       |                                                       |

**Annex 2:** List of the reviewed articles included in the systematic review (173).

Note that all these articles have not been cited in the main text.

1. Adams, B.T. & Matthews, S.N. (2019). Diverse temperate forest bird assemblages demonstrate closer correspondence to plant species composition than vegetation structure. *Ecography*, 42(10): 1752-1764. doi: 10.1111/ecog.04487.
2. Aguirre-Gutierrez, J., Wallis DeVries, M.F., Marshall, L., van't Zelfde, M., Villalobos-Arambula, A.R., Boekelo, B., Bartholomeus, H., Franzen, M. & Biesmeijer, J.C. (2017). Butterflies show different functional and species diversity in relationship to vegetation structure and land use. *Global Ecology and Biogeography*, 26(10): 1126-1137. doi: 10.1111/geb.12622.
3. Amaral, K.E., Palace, M., O'Brien, K.M., Fenderson, L.E. & Kovach, A.I. (2016). Anthropogenic Habitats Facilitate Dispersal of an Early Successional Obligate: Implications for Restoration of an Endangered Ecosystem. *Plos One*, 11(3): e0148842. doi: 10.1371/journal.pone.0148842.
4. Asner, G.P., Owen-Smith, N., Loarie, S.R., Davies, A.B., Le Roux, E. & Levick, S.R. (2015). Habitat differences do not explain population declines of sable antelope in an African savanna. *Journal of Zoology*, 297(3): 225-234. doi: 10.1111/jzo.12269.
5. Bae, S., Reineking, B., Ewald, M. & Mueller, J. (2014). Comparison of airborne lidar, aerial photography, and field surveys to model the habitat suitability of a cryptic forest species - the hazel grouse. *International Journal of Remote Sensing*, 35(17): 6469-6489. doi: 10.1080/01431161.2014.955145.
6. Bae, S., Mueller, J., Lee, D., Vierling, K.T., Vogeler, J.C., Vierling, L.A., Hudak, A.T., Latifi, H. & Thorn, S. (2018). Taxonomic, functional, and phylogenetic diversity of bird assemblages are oppositely associated to productivity and heterogeneity in temperate forests. *Remote Sensing of Environment*, 215: 145-156. doi: 10.1016/j.rse.2018.05.031.
7. Bae, S., Levick, S.R., Heidrich, L., Magdon, P., Leutner, B.F., Wöllauer, S., Serebryanyk, A., Nauss, T., Krzystek, P., Gossner, M.M., Schall, P., Heibl, C., Bässler, C., Doerfler, I., Schulze, E., Krah, F., Culmsee, H., Jung, K., Heurich, M., Fischer, M., Seibold, S., Thorn, S., Gerlach, T., Hothorn, T., Weisser, W.W. & Müller, J. (2019). Radar vision in the mapping of forest biodiversity from space. *Nature Communications*, 10(1): 4757. doi: 10.1038/s41467-019-12737-x.
8. Barnes, K.W., Islam, K. & Auer, S.A. (2016). Integrating LIDAR-derived canopy structure into cerulean warbler habitat models. *Journal of Wildlife Management*, 80(1): 101-116. doi: 10.1002/jwmg.995.
9. Bartels, S.F., Caners, R.T., Ogilvie, J., White, B. & Macdonald, S.E. (2018). Relating Bryophyte Assemblages to a Remotely Sensed Depth-to-Water Index in Boreal Forests. *Frontiers in Plant Science*, 9: 858. doi: 10.3389/fpls.2018.00858.
10. Bellamy, P.E., Hill, R.A., Rothery, P., Hinsley, S.A., Fuller, R.J. & Broughton, R.K. (2009). Willow Warbler *Phylloscopus trochilus* habitat in woods with different structure and management in southern England. *Bird Study*, 56: 338-348. doi: 10.1080/00063650902806914.
11. Bernheim, M., Shanas, U. & Avi Bar-Massada (2019). Soil Type Impacts Macrohabitat Selection and Spatiotemporal Activity Patterns of *Testudo graeca* in an



- Eastern Mediterranean Ecosystem. *Copeia*, 107(2): 332-340. doi: 10.1643/CE-18-066R1.
12. Blomdahl, E.M., Thompson, C.M., Kane, J.R., Kane, V.R., Churchill, D., Moskal, L.M. & Lutz, J.A. (2019). Forest structure predictive of fisher (*Pekania pennanti*) dens exists in recently burned forest in Yosemite, California, USA. *Forest Ecology and Management*, 444: 174-186. doi: 10.1016/j.foreco.2019.04.024.
  13. Boelman, N.T., Holbrook, J.D., Greaves, H.E., Krause, J.S., Chmura, H.E., Magney, T.S., Perez, J.H., Eitel, J.U.H., Gough, L., Vierling, K.T., Wingfield, J.C. & Vierling, L.A. (2016). Airborne laser scanning and spectral remote sensing give a bird's eye perspective on arctic tundra breeding habitat at multiple spatial scales. *Remote Sensing of Environment*, 184: 337-349. doi: 10.1016/j.rse.2016.07.012.
  14. Boelman, N.T., Asner, G.P., Hart, P.J. & Martin, R.E. (2007). Multi-trophic invasion resistance in Hawaii: Bioacoustics, field surveys, and airborne remote sensing. *Ecological Applications*, 17(8): 2137-2144. doi: 10.1890/07-0004.1.
  15. Bombi, P., Gnetti, V., D'Andrea, E., De Cinti, B., Taglianti, A.V., Bologna, M.A. & Matteucci, G. (2019). Identifying priority sites for insect conservation in forest ecosystems at high resolution: the potential of LiDAR data. *Journal of Insect Conservation*, 23(4): 689-698. doi: 10.1007/s10841-019-00162-w.
  16. Bradbury, R.B., Hill, R.A., Mason, D.C., Hinsley, S.A., Wilson, J.D., Balzter, H., Anderson, G.Q.A., Whittingham, M.J., Davenport, I.J. & Bellamy, P.E. (2005). Modelling relationships between birds and vegetation structure using airborne LiDAR data: a review with case studies from agricultural and woodland environments. *Ibis*, 147(3): 443-452. doi: 10.1111/j.1474-919x.2005.00438.x.
  17. Broughton, R.K., Hinsley, S.A., Bellamy, P.E., Hill, R.A. & Rothery, P. (2006). Marsh Tit *Poecile palustris* territories in a British broad-leaved wood. *Ibis*, 148(4): 744-752. doi: 10.1111/j.1474-919X.2006.00583.x.
  18. Broughton, R.K., Hill, R.A., Freeman, S.N., Bellamy, P.E. & Hinsley, S.A. (2012a). Describing Habitat Occupation by Woodland Birds with Territory Mapping and Remotely Sensed Data: An Example using the Marsh Tit (*Poecile palustris*). *The Condor*, 114(4): 812-822. doi: 10.1525/cond.2012.110171.
  19. Broughton, R.K., Hill, R.A., Henderson, L.J., Bellamy, P.E. & Hinsley, S.A. (2012b). Patterns of nest placement in a population of Marsh Tits *Poecile palustris*. *Journal of Ornithology*, 153(3): 735-746. doi: 10.1007/s10336-011-0790-2.
  20. Broughton, R.K., Bellamy, P.E., Hill, R.A. & Hinsley, S.A. (2014). Winter habitat selection by Marsh Tits *Poecile palustris* in a British woodland. *Bird Study*, 61(3): 404-412. doi: 10.1080/00063657.2014.934193.
  21. Carr, A., Zeale, M.R.K., Weatherall, A., Froidevaux, J.S.P. & Jones, G. (2018). Ground-based and LiDAR-derived measurements reveal scale-dependent selection of roost characteristics by the rare tree-dwelling bat *Barbastella barbastellus*. *Forest Ecology and Management*, 417: 237-246. doi: 10.1016/j.foreco.2018.02.041.
  22. Carrasco, L., Giam, X., Papes, M. & Sheldon, K.S. (2019). Metrics of Lidar-Derived 3D Vegetation Structure Reveal Contrasting Effects of Horizontal and Vertical Forest Heterogeneity on Bird Species Richness. *Remote Sensing*, 11(7): 743. doi: 10.3390/rs11070743.
  23. Casas, A., Garcia, M., Siegel, R.B., Koltunov, A., Ramirez, C. & Ustin, S. (2016). Burned forest characterization at single-tree level with airborne laser scanning for

- assessing wildlife habitat. *Remote Sensing of Environment*, 175: 231-241. doi: 10.1016/j.rse.2015.12.044.
24. Clawges, R., Vierling, K., Vierling, L. & Rowell, E. (2008). The use of airborne lidar to assess avian species diversity, density, and occurrence in a pine/aspen forest. *Remote Sensing of Environment*, 112(5): 2064-2073. doi: 10.1016/j.rse.2007.08.023.
  25. Cooper, W.J., McShea, W.J., Luther, D.A. & Forrester, T. (2020). Incorporating local habitat heterogeneity and productivity measures when modelling vertebrate richness. *Environmental Conservation*, 47(1): 7-14. doi: 10.1017/S0376892919000328.
  26. Coops, N.C., Duffe, J. & Koot, C. (2010). Assessing the utility of lidar remote sensing technology to identify mule deer winter habitat. *Canadian Journal of Remote Sensing*, 36(2): 81-88. doi: 10.5589/m10-029.
  27. Coops, N.C., Tompaski, P., Nijland, W., Rickbeil, G.J.M., Nielsen, S.E., Bater, C.W. & Stadt, J.J. (2016). A forest structure habitat index based on airborne laser scanning data. *Ecological Indicators*, 67: 346-357. doi: 10.1016/j.ecolind.2016.02.057.
  28. Culver, M., Gibeaut, J.C., Shaver, D.J., Tissot, P. & Starek, M. (2020). Using Lidar Data to Assess the Relationship Between Beach Geomorphology and Kemp's Ridley (*Lepidochelys kempii*) Nest Site Selection Along Padre Island, TX, United States. *Frontiers in Marine Science*, 7: 214.
  29. Davenport, I.J., Bradbury, R.B., Anderson, G., Hayman, G., Krebs, J.R., Mason, D.C., Wilson, J.D. & Veck, N.J. (2000). Improving bird population models using airborne remote sensing. *International Journal of Remote Sensing*, 21(13-14): 2705-2717. doi: 10.1080/01431160050110241.
  30. Davies, A.B., Levick, S.R., Asner, G.P., Robertson, M.P., van Rensburg, B.J. & Parr, C.L. (2014). Spatial variability and abiotic determinants of termite mounds throughout a savanna catchment. *Ecography*, 37(9): 852-862. doi: 10.1111/ecog.00532.
  31. Davies, A.B., Baldeck, C.A. & Asner, G.P. (2016). Termite mounds alter the spatial distribution of African savanna tree species. *Journal of Biogeography*, 43(2): 301-313. doi: 10.1111/jbi.12633.
  32. Davies, A.B., Tambling, C.J., Kerley, G.I.H. & Asner, G.P. (2016a). Effects of Vegetation Structure on the Location of Lion Kill Sites in African Thicket. *Plos One*, 11(2): e0149098. doi: 10.1371/journal.pone.0149098.
  33. Davies, A.B., Tambling, C.J., Kerley, G.I.H. & Asner, G.P. (2016b). Limited spatial response to direct predation risk by African herbivores following predator reintroduction. *Ecology and Evolution*, 6(16): 5728-5748. doi: 10.1002/ece3.2312.
  34. Davies, A.B., Oram, F., Ancrenaz, M. & Asner, G.P. (2019). Combining behavioural and LiDAR data to reveal relationships between canopy structure and orangutan nest site selection in disturbed forests. *Biological Conservation*, 232: 97-107. doi: 10.1016/j.biocon.2019.01.032.
  35. de Thoisy, B., Fayad, I., Clement, L., Barrioz, S., Poirier, E. & Gond, V. (2016). Predators, Prey and Habitat Structure: Can Key Conservation Areas and Early Signs of Population Collapse Be Detected in Neotropical Forests?. *Plos One*, 11(11): e0165362. doi: 10.1371/journal.pone.0165362.
  36. Ehmke, G., Maguire, G.S., Bird, T., Ierodiaconou, D. & Weston, M.A. (2016). An obligate beach bird selects sub-, inter- and supra-tidal habitat elements. *Estuarine Coastal and Shelf Science*, 181: 266-276. doi: 10.1016/j.ecss.2016.08.050.
  37. Eldegard, K., Dirksen, J.W., Orka, H.O., Halvorsen, R., Naesset, E., Gobakken, T. & Ohlson, M. (2014). Modelling bird richness and bird species presence in a boreal

- forest reserve using airborne laser-scanning and aerial images. *Bird Study*, 61(2): 204-219. doi: 10.1080/00063657.2014.885492.
38. Evans, L.J., Davies, A.B., Goossens, B. & Asner, G.P. (2017). Riparian vegetation structure and the hunting behavior of adult estuarine crocodiles. *Plos One*, 12(10): e0184804. doi: 10.1371/journal.pone.0184804.
  39. Ewald, M., Dupke, C., Heurich, M., Mueller, J. & Reineking, B. (2014). LiDAR Remote Sensing of Forest Structure and GPS Telemetry Data Provide Insights on Winter Habitat Selection of European Roe Deer. *Forests*, 5(6): 1374-1390. doi: 10.3390/f5061374.
  40. Ficetola, G.F., Bonardi, A., Mucher, C.A., Gilissen, N.L.M. & Padoa-Schioppa, E. (2014). How many predictors in species distribution models at the landscape scale? Land use versus LiDAR-derived canopy height. *International Journal of Geographical Information Science*, 28(8): 1723-1739. doi: 10.1080/13658816.2014.891222.
  41. Finnegan, L., Pigeon, K.E., Cranston, J., Hebblewhite, M., Musiani, M., Neufeld, L., Schmiegelow, F., Duval, J. & Stenhouse, G.B. (2018). Natural regeneration on seismic lines influences movement behaviour of wolves and grizzly bears. *Plos One*, 13(4): e0195480. doi: 10.1371/journal.pone.0195480.
  42. Flaherty, S., Lurz, P.W.W. & Patenaude, G. (2014). Use of LiDAR in the conservation management of the endangered red squirrel (*Sciurus vulgaris* L.). *Journal of Applied Remote Sensing*, 8: 083592. doi: 10.1117/1.JRS.8.083592.
  43. Flaspohler, D.J., Giardina, C.P., Asner, G.P., Hart, P., Price, J., Lyons, C.K. & Castaneda, X. (2010). Long-term effects of fragmentation and fragment properties on bird species richness in Hawaiian forests. *Biological Conservation*, 143(2): 280-288. doi: 10.1016/j.biocon.2009.10.009.
  44. Fotis, A.T., Patel, S. & Chavez, A.S. (2020). Habitat-based isolating barriers are not strong in the speciation of ecologically divergent squirrels (*Tamiasciurus douglasii* and *T. hudsonicus*). *Behavioral Ecology and Sociobiology*, 74(3): 32. doi: 10.1007/s00265-020-2814-5.
  45. Froidevaux, J.S.P., Zellweger, F., Bollmann, K., Jones, G. & Obrist, M.K. (2016). From field surveys to LiDAR: Shining a light on how bats respond to forest structure. *Remote Sensing of Environment*, 175: 242-250. doi: 10.1016/j.rse.2015.12.038.
  46. Gallagher, C.V., Keane, J.J., Shaklee, P.A., Kramer, H.A. & Gerrard, R. (2019). Spotted owl foraging patterns following fuels treatments, Sierra Nevada, California. *Journal of Wildlife Management*, 83(2): 487-501. doi: 10.1002/jwmg.21586.
  47. Garabedian, J.E., McGaughey, R.J., Reutebuch, S.E., Parresol, B.R., Kilgo, J.C., Moorman, C.E. & Peterson, M.N. (2014). Quantitative analysis of woodpecker habitat using high-resolution airborne LiDAR estimates of forest structure and composition. *Remote Sensing of Environment*, 145: 68-80. doi: 10.1016/j.rse.2014.01.022.
  48. Garabedian, J.E., Moorman, C.E., Peterson, M.N. & Kilgo, J.C. (2017). Use of LiDAR to define habitat thresholds for forest bird conservation. *Forest Ecology and Management*, 399: 24-36. doi: 10.1016/j.foreco.2017.05.024.
  49. Garabedian, J.E., Moorman, C.E., Peterson, M.N. & Kilgo, J.C. (2018). Relative importance of social factors, conspecific density, and forest structure on space use by the endangered Red-cockaded Woodpecker: A new consideration for habitat restoration. *Condor*, 120(2): 305-318. doi: 10.1650/CONDOR-17-211.1.

50. Garabedian, J.E., Moorman, C.E., Peterson, M.N. & Kilgo, J.C. (2020). Effects of group size and group density on trade-offs in resource selection by a group-territorial central-place foraging woodpecker. *Ibis*, 162(2): 477-491. doi: 10.1111/ibi.12733.
51. Garcia-Feced, C., Tempel, D.J. & Kelly, M. (2011). LiDAR as a Tool to Characterize Wildlife Habitat: California Spotted Owl Nesting Habitat as an Example. *Journal of Forestry*, 109(8): 436-443.
52. Glad, A., Reineking, B., Montadert, M., Depraz, A. & Monnet, J. (2020). Assessing the performance of object-oriented LiDAR predictors for forest bird habitat suitability modeling. *Remote Sensing in Ecology and Conservation*, 6(1): 5-19. doi: 10.1002/rse2.117.
53. Goetz, S., Steinberg, D., Dubayah, R. & Blair, B. (2007). Laser remote sensing of canopy habitat heterogeneity as a predictor of bird species richness in an eastern temperate forest, USA. *Remote Sensing of Environment*, 108(3): 254-263. doi: 10.1016/j.rse.2006.11.016.
54. Goetz, S.J., Steinberg, D., Betts, M.G., Holmes, R.T., Doran, P.J., Dubayah, R. & Hofton, M. (2010). Lidar remote sensing variables predict breeding habitat of a Neotropical migrant bird. *Ecology*, 91(6): 1569-1576. doi: 10.1890/09-1670.1.
55. Goetz, S.J., Sun, M., Zolkos, S., Hansen, A. & Dubayah, R. (2014). The relative importance of climate and vegetation properties on patterns of North American breeding bird species richness. *Environmental Research Letters*, 9(3): 034013. doi: 10.1088/1748-9326/9/3/034013.
56. Goodwin, C.E.D., Hodgson, D.J., Bailey, S., Bennie, J. & McDonald, R.A. (2018). Habitat preferences of hazel dormice *Muscardinus avellanarius* and the effects of tree-felling on their movement. *Forest Ecology and Management*, 427: 190-199. doi: 10.1016/j.foreco.2018.03.035.
57. Gossner, M.M., Wende, B., Levick, S., Schall, P., Floren, A., Linsenmair, K.E., Steffan-Dewenter, I., Schulze, E. & Weisser, W.W. (2016). Deadwood enrichment in European forests - Which tree species should be used to promote saproxylic beetle diversity?. *Biological Conservation*, 201: 92-102. doi: 10.1016/j.biocon.2016.06.032.
58. Graf, R.F., Mathys, L. & Bollmann, K. (2009). Habitat assessment for forest dwelling species using LiDAR remote sensing: Capercaillie in the Alps. *Forest Ecology and Management*, 257(1): 160-167. doi: 10.1016/j.foreco.2008.08.021.
59. Hagar, J.C., Eskelson, B.N.I., Haggerty, P.K., Nelson, S.K. & Vesely, D.G. (2014). Modeling Marbled Murrelet (*Brachyramphus marmoratus*) Habitat Using LiDAR-Derived Canopy Data. *Wildlife Society Bulletin*, 38(2): 237-249. doi: 10.1002/wsb.407.
60. Hagar, J.C., Yost, A. & Haggerty, P.K. (2020). Incorporating LiDAR metrics into a structure-based habitat model for a canopy-dwelling species. *Remote Sensing of Environment*, 236: 111499. doi: 10.1016/j.rse.2019.111499.
61. Hatfield, J.S., Reynolds, M.H., Seavy, N.E. & Krause, C.M. (2012). Population Dynamics of Hawaiian Seabird Colonies Vulnerable to Sea-Level Rise. *Conservation Biology*, 26(4): 667-678. doi: 10.1111/j.1523-1739.2012.01853.x.
62. Hatten, J.R. (2014). Mapping and monitoring Mount Graham red squirrel habitat with Lidar and Landsat imagery. *Ecological Modelling*, 289: 106-123. doi: 10.1016/j.ecolmodel.2014.07.004.
63. Hess, A.N., Falkowski, M.J., Webster, C.R., Storer, A.J., Pocewicz, A. & Martinuzzi, S. (2013). Employing lidar data to identify butterfly habitat characteristics of four

- contrasting butterfly species across a diverse landscape. *Remote Sensing Letters*, 4(4): 354-363. doi: 10.1080/2150704X.2012.734932.
64. Hill, R.A. & Hinsley, S.A. (2015). Airborne Lidar for Woodland Habitat Quality Monitoring: Exploring the Significance of Lidar Data Characteristics when Modelling Organism-Habitat Relationships. *Remote Sensing*, 7(4): 3446-3466. doi: 10.3390/rs70403446.
  65. Hinsley, S.A., Hill, R.A., Gaveau, D.L.A. & Bellamy, P.E. (2002). Quantifying woodland structure and habitat quality for birds using airborne laser scanning. *Functional Ecology*, 16(6): 851-857. doi: 10.1046/j.1365-2435.2002.00697.x.
  66. Hinsley, S.A., Hill, R.A., Bellamy, P.E. & Balzter, H. (2006). The application of lidar in woodland bird ecology: Climate, canopy structure, and habitat quality. *Photogrammetric Engineering and Remote Sensing*, 72(12): 1399-1406. doi: 10.14358/PERS.72.12.1399.
  67. Hinsley, S.A., Hill, R.A., Bellamy, P.E., Harrison, N.M., Speakman, J.R., Wilson, A.K. & Ferns, P.N. (2008). Effects of structural and functional habitat gaps on breeding woodland birds: working harder for less. *Landscape Ecology*, 23(5): 615-626. doi: 10.1007/s10980-008-9225-8.
  68. Hinsley, S.A., Hill, R.A., Bellamy, P., Broughton, R.K., Harrison, N.M., Mackenzie, J.A., Speakman, J.R. & Ferns, P.N. (2009a). Do Highly Modified Landscapes Favour Generalists at the Expense of Specialists? An Example using Woodland Birds. *Landscape Research*, 34(5): 509-526. doi: 10.1080/01426390903177276.
  69. Hinsley, S.A., Hill, R.A., Fuller, R.J., Bellamy, P.E. & Rothery, P. (2009b). Bird species distributions across woodland canopy structure gradients. *Community Ecology*, 10(1): 99-110. doi: 10.1556/ComEc.10.2009.1.12.
  70. Hogan, S. & Reidenbach, M.A. (2019). Quantifying and mapping intertidal oyster reefs utilizing LiDAR-based remote sensing. *Mar Ecol Prog Ser*, 630: 83-99.
  71. Huber, N., Kienast, F., Ginzler, C. & Pasinelli, G. (2016). Using remote-sensing data to assess habitat selection of a declining passerine at two spatial scales. *Landscape Ecology*, 31(9): 1919-1937. doi: 10.1007/s10980-016-0370-1.
  72. Huber, N., Kery, M. & Pasinelli, G. (2017). Occupancy dynamics of the Wood Warbler *Phylloscopus sibilatrix* assessed with habitat and remote sensing data. *Ibis*, 159(3): 623-637. doi: 10.1111/ibi.12472.
  73. Hull, I.T. & Shipley, L.A. (2019). Testing the Ability of Airborne LiDAR to Measure Forage Resources for Wild Ungulates in Conifer Forests. *Journal of Forestry*, 117(5): 492-503. doi: 10.1093/jofore/fvz040.
  74. Jaime-Gonzalez, C., Acebes, P., Mateos, A. & Mezquida, E.T. (2017). Bridging gaps: On the performance of airborne LiDAR to model wood mouse-habitat structure relationships in pine forests. *Plos One*, 12(8): e0182451. doi: 10.1371/journal.pone.0182451.
  75. Jenkins, J.M.A., Lesmeister, D.B., Wiens, J.D., Kane, J.T., Kane, V.R. & Verschuyt, J. (2019). Three-dimensional partitioning of resources by congeneric forest predators with recent sympatry. *Scientific Reports*, 9: 6036. doi: 10.1038/s41598-019-42426-0.
  76. Jirinec, V., Isdell, R.E. & Leu, M. (2016). Prey availability and habitat structure explain breeding space use of a migratory songbird. *Condor*, 118(2): 309-328. doi: 10.1650/CONDOR-15-140.1.
  77. Jones, T.G., Arcese, P., Sharma, T. & Coops, N.C. (2013). Describing avifaunal richness with functional and structural bioindicators derived from advanced

- airborne remotely sensed data. *International Journal of Remote Sensing*, 34(8): 2689-2713. doi: 10.1080/01431161.2012.750019.
78. Julian, J.T., Young, J.A., Jones, J.W., Snyder, C.D. & Wright, C.W. (2009). The use of local indicators of spatial association to improve LiDAR-derived predictions of potential amphibian breeding ponds. *Journal of Geographical Systems*, 11(1): 89-106. doi: 10.1007/s10109-008-0074-4.
  79. Jung, K., Kaiser, S., Boehm, S., Nieschulze, J. & Kalko, E.K.V. (2012). Moving in three dimensions: effects of structural complexity on occurrence and activity of insectivorous bats in managed forest stands. *Journal of Applied Ecology*, 49(2): 523-531. doi: 10.1111/j.1365-2664.2012.02116.x.
  80. Kawaguchi, T. & Desrochers, A. (2017). Short-term changes in spatial distribution pattern of an herbivore in response to accumulating snow. *Canadian Journal of Zoology*, 95(12): 949-954. doi: 10.1139/cjz-2016-0287.
  81. Keim, J.L., DeWitt, P.D., Fitzpatrick, J.J. & Jenni, N.S. (2017). Estimating plant abundance using inflated beta distributions: Applied learnings from a lichen-caribou ecosystem. *Ecology and Evolution*, 7(2): 486-493. doi: 10.1002/ece3.2625.
  82. Kellner, K.F., Ruhl, P.J., Dunning, J.B., Jr., Barnes, K.W., Saunders, M.R. & Swihart, R.K. (2018). Local-scale Habitat Components Driving Bird Abundance in Eastern Deciduous Forests. *American Midland Naturalist*, 180(1): 52-65. doi: 10.1674/0003-0031-180.1.52.
  83. Kerfoot, W.C., Hobmeier, M.M., Regis, R., Raman, V.K., Brooks, C.N., Shuchman, R., Sayers, M., Yousef, F. & Reif, M. (2019). Lidar (light detection and ranging) and benthic invertebrate investigations: Migrating tailings threaten Buffalo Reef in Lake Superior. *Journal of Great Lakes Research*, 45(5): 872-887. doi: 10.1016/j.jglr.2019.07.009.
  84. Khanaposhtani, M.G., Gasc, A., Francomano, D., Villanueva-Rivera, L.J., Jung, J., Mossman, M.J. & Pijanowski, B.C. (2019). Effects of highways on bird distribution and soundscape diversity around Aldo Leopold's shack in Baraboo, Wisconsin, USA. *Landscape and Urban Planning*, 192: UNSP 103666. doi: 10.1016/j.landurbplan.2019.103666.
  85. Klein, J., Haverkamp, P.J., Lindberg, E., Griesser, M. & Eggers, S. (2020). Remotely sensed forest understory density and nest predator occurrence interact to predict suitable breeding habitat and the occurrence of a resident boreal bird species. *Ecology and Evolution*, 10(4): 2238-2252. doi: 10.1002/ece3.6062.
  86. Korpela, I., Haapanen, R., Korrensalo, A., Tuittila, E. & Vesala, T. (2020). Fine-resolution mapping of microforms of a boreal bog using aerial images and waveform-recording LiDAR. *Mires and Peat*, 26 doi: 10.19189/MaP.2018.OMB.388.
  87. Kortmann, M., Hurst, J., Brinkmann, R., Heurich, M., Gonzalez, R.S., Mueller, J. & Thorn, S. (2018b). Beauty and the beast: how a bat utilizes forests shaped by outbreaks of an insect pest. *Animal Conservation*, 21(1): 21-30. doi: 10.1111/acv.12359.
  88. Kortmann, M., Heurich, M., Latifi, H., Roesner, S., Seidl, R., Mueller, J. & Thorn, S. (2018a). Forest structure following natural disturbances and early succession provides habitat for two avian flagship species, capercaillie (*Tetrao urogallus*) and hazel grouse (*Tetrastes bonasia*). *Biological Conservation*, 226: 81-91. doi: 10.1016/j.biocon.2018.07.014.

89. Kristensen, T., Naesset, E., Ohlson, M., Bolstad, P.V. & Kolka, R. (2015). Mapping Above- and Below-Ground Carbon Pools in Boreal Forests: The Case for Airborne Lidar. *Plos One*, 10(10): e0138450. doi: 10.1371/journal.pone.0138450.
90. Kroeger, A.J., Moorman, C.E., Lashley, M.A., Chitwood, M.C., Harper, C.A. & DePerno, C.S. (2020). White-tailed deer use of overstory hardwoods in longleaf pine woodlands. *Forest Ecology and Management*, 464: 118046. doi: 10.1016/j.foreco.2020.118046.
91. Lacki, M.J., Dodd, L.E., Skowronski, N.S., Dickinson, M.B. & Rieske, L.K. (2017). Relationships among burn severity, forest canopy structure and bat activity from spring burns in oak-hickory forests. *International Journal of Wildland Fire*, 26(11): 963-972. doi: 10.1071/WF16159.
92. Langford, Z., Kumar, J., Hoffman, F.M., Norby, R.J., Wulschleger, S.D., Sloan, V.L. & Iversen, C.M. (2016). Mapping Arctic Plant Functional Type Distributions in the Barrow Environmental Observatory Using WorldView-2 and LiDAR Datasets. *Remote Sensing*, 8(9): 733. doi: 10.3390/rs8090733.
93. Leivits, M. & Leivits, A. (2009). Use of sequential aerial photography and LiDAR for mapping Scots Pine (*Pinus sylvestris*) encroachment and change detection in bird habitats from 1950 to 2007 in Nigula Bog (Estonia). doi: 10.13140/RG.2.1.2668.8728.
94. Lesak, A.A., Radloff, V.C., Hawbaker, T.J., Pidgeon, A.M., Gobakken, T. & Contrucci, K. (2011). Modeling forest songbird species richness using LiDAR-derived measures of forest structure. *Remote Sensing of Environment*, 115(11): 2823-2835. doi: 10.1016/j.rse.2011.01.025.
95. Levick, S.R., Asner, G.P., Chadwick, O.A., Khomo, L.M., Rogers, K.H., Hartshorn, A.S., Kennedy-Bowdoin, T. & Knapp, D.E. (2010). Regional insight into savanna hydrogeomorphology from termite mounds. *Nature Communications*, 1: 65. doi: 10.1038/ncomms1066.
96. Lindberg, E., Roberge, J., Johansson, T. & Hjalten, J. (2015). Can Airborne Laser Scanning (ALS) and Forest Estimates Derived from Satellite Images Be Used to Predict Abundance and Species Richness of Birds and Beetles in Boreal Forest?. *Remote Sensing*, 7(4): 4233-4252. doi: 10.3390/rs70404233.
97. Linnell, M.A., Davis, R.J., Lesmeister, D.B. & Swingle, J.K. (2017). Conservation and relative habitat suitability for an arboreal mammal associated with old forest. *Forest Ecology and Management*, 402: 1-11. doi: 10.1016/j.foreco.2017.07.004.
98. Loarie, S.R., Tambling, C.J. & Asner, G.P. (2013). Lion hunting behaviour and vegetation structure in an African savanna. *Animal Behaviour*, 85(5): 899-906. doi: 10.1016/j.anbehav.2013.01.018.
99. Lone, K., Loe, L.E., Gobakken, T., Linnell, J.D.C., Odden, J., Remmen, J. & Mysterud, A. (2014). Living and dying in a multi-predator landscape of fear: roe deer are squeezed by contrasting pattern of predation risk imposed by lynx and humans. *Oikos*, 123(6): 641-651. doi: 10.1111/j.1600-0706.2013.00938.x.
100. Lorenz, T.J., Vierling, K.T., Vogeler, J., Lonneker, J. & Aycrigg, J. (2015). Incorporating Shrub and Snag Specific LiDAR Data into GAP Wildlife Models. *Journal of Fish and Wildlife Management*, 6(2): 437-447. doi: 10.3996/092013-JFWM-064.
101. Mangan, A.O., Chestnut, T., Vogeler, J.C., Breckheimer, I.K., King, W.M., Bagnall, K.E. & Dugger, K.M. (2019). Barred Owls reduce occupancy and breeding

- propensity of Northern Spotted Owl in a Washington old-growth forest. *Condor*, 121(3): UNSP duz031. doi: 10.1093/condor/duz031.
102. Martinuzzi, S., Vierling, L.A., Gould, W.A., Falkowski, M.J., Evans, J.S., Hudak, A.T. & Vierling, K.T. (2009). Mapping snags and understory shrubs for a LiDAR-based assessment of wildlife habitat suitability. *Remote Sensing of Environment*, 113(12): 2533-2546. doi: 10.1016/j.rse.2009.07.002.
  103. Mason, D.C., Anderson, G.Q.A., Bradbury, R.B., Cobby, D.M., Davenport, I.J., Vandepoll, M. & Wilson, J.D. (2003). Measurement of habitat predictor variables for organism-habitat models using remote sensing and image segmentation. *International Journal of Remote Sensing*, 24(12): 2515-2532. doi: 10.1080/014311602100100848.
  104. McLean, K.A., Trainor, A.M., Asner, G.P., Crofoot, M.C., Hopkins, M.E., Campbell, C.J., Martin, R.E., Knapp, D.E. & Jansen, P.A. (2016). Movement patterns of three arboreal primates in a Neotropical moist forest explained by LiDAR-estimated canopy structure. *Landscape Ecology*, 31(8): 1849-1862. doi: 10.1007/s10980-016-0367-9.
  105. Meiman, S., Civco, D., Holsinger, K. & Elphick, C.S. (2012). Comparing Habitat Models Using Ground-Based and Remote Sensing Data: Saltmarsh Sparrow Presence Versus Nesting. *Wetlands*, 32(4): 725-736. doi: 10.1007/s13157-012-0306-8.
  106. Melin, M., Packalen, P., Matala, J., Mehtatalo, L. & Pusenius, J. (2013). Assessing and modeling moose (*Alces alces*) habitats with airborne laser scanning data. *International Journal of Applied Earth Observation and Geoinformation*, 23: 389-396. doi: 10.1016/j.jag.2012.11.004.
  107. Melin, M., Matala, J., Mehtatalo, L., Pusenius, J. & Packalen, P. (2016). Ecological dimensions of airborne laser scanning - Analyzing the role of forest structure in moose habitat use within a year. *Remote Sensing of Environment*, 173: 238-247. doi: 10.1016/j.rse.2015.07.025.
  108. Melin, M., Hinsley, S.A., Broughton, R.K., Bellamy, P. & Hill, R.A. (2018). Living on the edge: utilising lidar data to assess the importance of vegetation structure for avian diversity in fragmented woodlands and their edges. *Landscape Ecology*, 33(6): 895-910. doi: 10.1007/s10980-018-0639-7.
  109. Melin, M., Matala, J., Mehtatalo, L., Tiilikainen, R., Tikkanen, O., Maltamo, M., Pusenius, J. & Packalen, P. (2014). Moose (*Alces alces*) reacts to high summer temperatures by utilizing thermal shelters in boreal forests - an analysis based on airborne laser scanning of the canopy structure at moose locations. *Global Change Biology*, 20(4): 1115-1125. doi: 10.1111/gcb.12405.
  110. Melin, M., Hill, R.A., Bellamy, P.E. & Hinsley, S.A. (2019). On Bird Species Diversity and Remote Sensing-Utilizing Lidar and Hyperspectral Data to Assess the Role of Vegetation Structure and Foliage Characteristics as Drivers of Avian Diversity. *Ieee Journal of Selected Topics in Applied Earth Observations and Remote Sensing*, 12(7): 2270-2278. doi: 10.1109/JSTARS.2019.2906940.
  111. Milanese, P., Holderegger, R., Bollmann, K., Gugerli, F. & Zellweger, F. (2017). Three-dimensional habitat structure and landscape genetics: a step forward in estimating functional connectivity. *Ecology*, 98(2): 393-402. doi: 10.1002/ecy.1645.
  112. Moeslund, J.E., Zlinszky, A., Ejrnaes, R., Brunbjerg, A.K., Bocher, P.K., Svenning, J. & Normand, S. (2019). Light detection and ranging explains diversity of plants, fungi, lichens, and bryophytes across multiple habitats and large



- geographic extent. *Ecological Applications*, 29(5): UNSP e01907. doi: 10.1002/eap.1907.
113. Mononen, L., Auvinen, A.-., Packalen, P., Virkkala, R., Valbuena, R., Bohlin, I., Valkama, J. & Vihervaara, P. (2018). Usability of citizen science observations together with airborne laser scanning data in determining the habitat preferences of forest birds. *Forest Ecology and Management*, 430: 498-508. doi: 10.1016/j.foreco.2018.08.040.
  114. Moreira-Arce, D., Vergara, P.M., Boutin, S., Carrasco, G., Briones, R., Soto, G.E. & Jimenez, J.E. (2016). Mesocarnivores respond to fine-grain habitat structure in a mosaic landscape comprised by commercial forest plantations in southern Chile. *Forest Ecology and Management*, 369: 135-143. doi: 10.1016/j.foreco.2016.03.024.
  115. Müller, J. & Brandl, R. (2009). Assessing biodiversity by remote sensing in mountainous terrain: the potential of LiDAR to predict forest beetle assemblages. *Journal of Applied Ecology*, 46(4): 897-905. doi: 10.1111/j.1365-2664.2009.01677.x.
  116. Müller, J., Moning, C., Baessler, C., Heurich, M. & Brandl, R. (2009). Using airborne laser scanning to model potential abundance and assemblages of forest passerines. *Basic and Applied Ecology*, 10(7): 671-681. doi: 10.1016/j.baae.2009.03.004.
  117. Müller, J., Stadler, J. & Brandl, R. (2010). Composition versus physiognomy of vegetation as predictors of bird assemblages: The role of lidar. *Remote Sensing of Environment*, 114(3): 490-495. doi: 10.1016/j.rse.2009.10.006.
  118. Müller, J., Brandl, R., Buchner, J., Pretzsch, H., Seifert, S., Straetz, C., Veith, M. & Fenton, B. (2013). From ground to above canopy-Bat activity in mature forests is driven by vegetation density and height. *Forest Ecology and Management*, 306: 179-184. doi: 10.1016/j.foreco.2013.06.043.
  119. Müller, J., Bae, S., Roeder, J., Chao, A. & Didham, R.K. (2014). Airborne LiDAR reveals context dependence in the effects of canopy architecture on arthropod diversity. *Forest Ecology and Management*, 312: 129-137. doi: 10.1016/j.foreco.2013.10.014.
  120. Müller, J., Brandl, R., Braendle, M., Foerster, B., de Araujo, B.C., Gossner, M.M., Ladas, A., Wagner, M., Maraun, M., Schall, P., Schmidt, S., Heurich, M., Thorn, S. & Seibold, S. (2018). LiDAR-derived canopy structure supports the more-individuals hypothesis for arthropod diversity in temperate forests. *Oikos*, 127(6): 814-824. doi: 10.1111/oik.04972.
  121. Nelson, R., Keller, C. & Ratnaswamy, M. (2005). Locating and estimating the extent of Delmarva fox squirrel habitat using an airborne LiDAR profiler. *Remote Sensing of Environment*, 96(3-4): 292-301. doi: 10.1016/j.rse.2005.02.012.
  122. North, M.P., Kane, J.T., Kane, V.R., Asner, G.P., Berigan, W., Churchill, D.J., Conway, S., Gutierrez, R.J., Jeronimo, S., Keane, J., Koltunov, A., Mark, T., Moskal, M., Munton, T., Peery, Z., Ramirez, C., Sollmann, R., White, A. & Whitmore, S. (2017). Cover of tall trees best predicts California spotted owl habitat. *Forest Ecology and Management*, 405: 166-178. doi: 10.1016/j.foreco.2017.09.019.
  123. Palminteri, S., Powell, G.V.N., Asner, G.P. & Peres, C.A. (2012). LiDAR measurements of canopy structure predict spatial distribution of a tropical mature forest primate. *Remote Sensing of Environment*, 127: 98-105. doi: 10.1016/j.rse.2012.08.014.
  124. Paulson, E.L. & Martin, A.P. (2014). Discerning invasion history in an ephemeral connected system: landscape genetics of *Procambarus clarkii* in Ash

- Meadows, Nevada. *Biological Invasions*, 16(8): 1719-1734. doi: 10.1007/s10530-013-0621-x.
125. Peckham, S.D., Ahl, D.E. & Gower, S.T. (2009). Bryophyte cover estimation in a boreal black spruce forest using airborne lidar and multispectral sensors. *Remote Sensing of Environment*, 113(6): 1127-1132. doi: 10.1016/j.rse.2009.02.008.
  126. Peura, M., Gonzalez, R.S., Mueller, J., Heurich, M., Vierling, L.A., Moenkkonen, M. & Baessler, C. (2016). Mapping a 'cryptic kingdom': Performance of lidar derived environmental variables in modelling the occurrence of forest fungi. *Remote Sensing of Environment*, 186: 428-438. doi: 10.1016/j.rse.2016.09.003.
  127. Redhead, J.W., Pywell, R.F., Bellamy, P.E., Broughton, R.K., Hill, R.A. & Hinsley, S.A. (2013). Great tits *Parus major* and blue tits *Cyanistes caeruleus* as indicators of agri-environmental habitat quality. *Agriculture Ecosystems & Environment*, 178: 31-38. doi: 10.1016/j.agee.2013.06.015.
  128. Renner, S.C., Baur, S., Possler, A., Winkler, J., Kalko, E.K.V., Bates, P.J.J. & Mello, M.A.R. (2012). Food Preferences of Winter Bird Communities in Different Forest Types. *Plos One*, 7(12): e53121. doi: 10.1371/journal.pone.0053121.
  129. Renner, S.C., Luedtke, B., Kaiser, S., Kienle, J., Schaefer, H.M., Segelbacher, G., Tschapka, M. & Santiago-Alarcon, D. (2016). Forests of opportunities and mischief: disentangling the interactions between forests, parasites and immune responses. *International Journal for Parasitology*, 46(9): 571-579. doi: 10.1016/j.ijpara.2016.04.008.
  130. Renner, S.C., Suarez-Rubio, M., Kaiser, S., Nieschulze, J., Kalko, E.K.V., Tschapka, M. & Jung, K. (2018). Divergent response to forest structure of two mobile vertebrate groups. *Forest Ecology and Management*, 415: 129-138. doi: 10.1016/j.foreco.2018.02.028.
  131. Riley, J.W., Calhoun, D.L., Barichivich, W.J. & Walls, S.C. (2017). Identifying Small Depressional Wetlands and Using a Topographic Position Index to Infer Hydroperiod Regimes for Pond-Breeding Amphibians. *Wetlands*, 37(2): 325-338. doi: 10.1007/s13157-016-0872-2.
  132. Rodriguez-Caballero, E., Raul Roman, J., Chamizo, S., Roncero Ramos, B. & Canton, Y. (2019). Biocrust landscape-scale spatial distribution is strongly controlled by terrain attributes: Topographic thresholds for colonization in a semiarid badland system. *Earth Surface Processes and Landforms*, 44(14): 2771-2779. doi: 10.1002/esp.4706.
  133. Roll, U., Geffen, E. & Yom-Tov, Y. (2015). Linking vertebrate species richness to tree canopy height on a global scale. *Global Ecology and Biogeography*, 24(7): 814-825. doi: 10.1111/geb.12325.
  134. Sasaki, T., Imanishi, J., Fukui, W. & Morimoto, Y. (2016). Fine-scale characterization of bird habitat using airborne LiDAR in an urban park in Japan. *Urban Forestry & Urban Greening*, 17: 16-22. doi: 10.1016/j.ufug.2016.03.007.
  135. Schooler, S.L. & Zald, H.S.J. (2019). Lidar Prediction of Small Mammal Diversity in Wisconsin, USA. *Remote Sensing*, 11(19) doi: 10.3390/rs11192222.
  136. Seaman, D.J., I., Bernard, H., Ancrenaz, M., Coomes, D., Swinfield, T., Milodowski, D.T., Humle, T. & Struebig, M.J. (2019). Densities of Bornean orang-utans (*Pongo pygmaeus morio*) in heavily degraded forest and oil palm plantations in Sabah, Borneo. *American Journal of Primatology*, 81(8): e23030. doi: 10.1002/ajp.23030.

137. Seavy, N.E., Viers, J.H. & Wood, J.K. (2009). Riparian bird response to vegetation structure: a multiscale analysis using LiDAR measurements of canopy height. *Ecological Applications*, 19(7): 1848-1857. doi: 10.1890/08-1124.1.
138. Seibold, S., Baessler, C., Brandl, R., Fahrig, L., Foerster, B., Heurich, M., Hothorn, T., Scheipl, F., Thorn, S. & Mueller, J. (2017). An experimental test of the habitat-amount hypothesis for saproxylic beetles in a forested region. *Ecology*, 98(6): 1613-1622. doi: 10.1002/ecy.1819.
139. Sillero, N. & Goncalves-Seco, L. (2014). Spatial structure analysis of a reptile community with airborne LiDAR data. *International Journal of Geographical Information Science*, 28(8): 1709-1722. doi: 10.1080/13658816.2014.902062.
140. Singh, M., Tokola, T., Hou, Z. & Notarnicola, C. (2017). Remote sensing-based landscape indicators for the evaluation of threatened-bird habitats in a tropical forest. *Ecology and Evolution*, 7(13): 4552-4567. doi: 10.1002/ece3.2970.
141. Singh, M., Cheyne, S.M. & Smith, D.A.E. (2018). How conspecific primates use their habitats: Surviving in an anthropogenically-disturbed forest in Central Kalimantan, Indonesia. *Ecological Indicators*, 87: 167-177. doi: 10.1016/j.ecolind.2017.12.041.
142. Smart, L.S., Swenson, J.J., Christensen, N.L. & Sexton, J.O. (2012). Three-dimensional characterization of pine forest type and red-cockaded woodpecker habitat by small-footprint, discrete-return lidar. *Forest Ecology and Management*, 281: 100-110. doi: 10.1016/j.foreco.2012.06.020.
143. Sovern, S.G., Lesmeister, D.B., Dugger, K.M., Pruett, M.S., Davis, R.J. & Jenkins, J.M. (2019). Activity center selection by northern spotted owls. *Journal of Wildlife Management*, 83(3): 714-727. doi: 10.1002/jwmg.21632.
144. Stephenson, N., Perroy, R., Eiben, J. & Klasner, F. (2017). High resolution habitat suitability modelling for an endemic restricted-range Hawaiian insect (*Nysius wekiuicola*, Hemiptera: Lygaeidae). *Journal of Insect Conservation*, 21(1): 87-96. doi: 10.1007/s10841-017-9956-4.
145. Svendsen, J.K., Sell, H., Bocher, P.K. & Svenning, J. (2015). Habitat and nest site preferences of Red-backed Shrike (*Lanius collurio*) in western Denmark. *Ornis Fennica*, 92(2): 63-75.
146. Swatantran, A., Dubayah, R., Goetz, S., Hofton, M., Betts, M.G., Sun, M., Simard, M. & Holmes, R. (2012). Mapping Migratory Bird Prevalence Using Remote Sensing Data Fusion. *Plos One*, 7(1): e28922. doi: 10.1371/journal.pone.0028922.
147. Swift, C.E., Vierling, K.T., Hudak, A.T. & Vierling, L.A. (2017). Relationships among Vegetation Structure, Canopy Composition, and Avian Richness Patterns across an Aspen-Conifer Forest Gradient. *Canadian Journal of Remote Sensing*, 43(3): 231-243. doi: 10.1080/07038992.2017.1317205.
148. Taillie, P.J., Moorman, C.E., Smart, L.S. & Pacifici, K. (2019). Bird community shifts associated with saltwater exposure in coastal forests at the leading edge of rising sea level. *Plos One*, 14(5): e0216540. doi: 10.1371/journal.pone.0216540.
149. Tattoni, C., Rizzolli, F. & Pedrini, P. (2012). Can LiDAR data improve bird habitat suitability models?. *Ecological Modelling*, 245: 103-110. doi: 10.1016/j.ecolmodel.2012.03.020.
150. Thers, H., Brunbjerg, A.K., Laessoe, T., Ejrnaes, R., Bocher, P.K. & Svenning, J. (2017). Lidar-derived variables as a proxy for fungal species richness and

- composition in temperate Northern Europe. *Remote Sensing of Environment*, 200: 102-113. doi: 10.1016/j.rse.2017.08.011.
151. Trainor, A.M., Walters, J.R., Morris, W.F., Sexton, J. & Moody, A. (2013). Empirical estimation of dispersal resistance surfaces: a case study with red-cockaded woodpeckers. *Landscape Ecology*, 28(4): 755-767. doi: 10.1007/s10980-013-9861-5.
  152. Tweedy, P.J., Moriarty, K.M., Bailey, J.D. & Epps, C.W. (2019). Using fine scale resolution vegetation data from LiDAR and ground-based sampling to predict Pacific marten resting habitat at multiple spatial scales. *Forest Ecology and Management*, 452: 117556. doi: 10.1016/j.foreco.2019.117556.
  153. Vauhkonen, J. & Imponen, J. (2016). Unsupervised classification of airborne laser scanning data to locate potential wildlife habitats for forest management planning. *Forestry*, 89(4): 350-363. doi: 10.1093/forestry/cpw011.
  154. Vierling, K.T., Baessler, C., Brandl, R., Vierling, L.A., Weiss, I. & Mueller, J. (2011). Spinning a laser web: predicting spider distributions using LiDAR. *Ecological Applications*, 21(2): 577-588. doi: 10.1890/09-2155.1.
  155. Vierling, K.T., Swift, C.E., Hudak, A.T., Vogeler, J.C. & Vierling, L.A. (2014). How much does the time lag between wildlife field- data collection and LiDAR- data acquisition matter for studies of animal distributions? A case study using bird communities. *Remote Sensing Letters*, 5(2): 185-193. doi: 10.1080/2150704X.2014.891773.
  156. Vierling, L.A., Vierling, K.T., Adam, P. & Hudak, A.T. (2013). Using Satellite and Airborne LiDAR to Model Woodpecker Habitat Occupancy at the Landscape Scale. *Plos One*, 8(12): e80988. doi: 10.1371/journal.pone.0080988.
  157. Vihervaara, P., Mononen, L., Auvinen, A., Virkkala, R., Lu, Y., Pippuri, I., Packalen, P., Valbuena, R. & Valkama, J. (2015). How to integrate remotely sensed data and biodiversity for ecosystem assessments at landscape scale. *Landscape Ecology*, 30(3): 501-516. doi: 10.1007/s10980-014-0137-5.
  158. Vogeler, J.C., Hudak, A.T., Vierling, L.A. & Vierling, K.T. (2013). Lidar-Derived Canopy Architecture Predicts Brown Creeper Occupancy of Two Western Coniferous Forests. *Condor*, 115(3): 614-622. doi: 10.1525/cond.2013.110082.
  159. Vogeler, J.C., Hudak, A.T., Vierling, L.A., Evans, J., Green, P. & Vierling, K.I.T. (2014). Terrain and vegetation structural influences on local avian species richness in two mixed-conifer forests. *Remote Sensing of Environment*, 147: 13-22. doi: 10.1016/j.rse.2014.02.006.
  160. Vogeler, J.C., Yang, Z. & Cohen, W.B. (2016). Mapping Suitable Lewis's Woodpecker Nesting Habitat in a Post-Fire Landscape. *Northwest Science*, 90(4): 421-432. doi: 10.3955/046.090.0404.
  161. Wallis, C.I.B., Paulsch, D., Zeilinger, J., Silva, B., Fernandez, G.F.C., Brandl, R., Farwig, N. & Bendix, J. (2016). Contrasting performance of Lidar and optical texture models in predicting avian diversity in a tropical mountain forest. *Remote Sensing of Environment*, 174: 223-232. doi: 10.1016/j.rse.2015.12.019.
  162. Weisberg, P.J., Dilts, T.E., Becker, M.E., Young, J.S., Wong-Kone, D.C., Newton, W.E. & Ammon, E.M. (2014). Guild-specific responses of avian species richness to LiDAR-derived habitat heterogeneity. *Acta Oecologica-International Journal of Ecology*, 59: 72-83. doi: 10.1016/j.actao.2014.06.002.

163. Work, T.T., St Onge, B. & Jacobs, J.M. (2011). Response of female beetles to LIDAR derived topographic variables in Eastern boreal mixedwood forests (Coleoptera, Carabidae). *Zookeys*(147): 623-639. doi: 10.3897/zookeys.147.2013.
164. Wu, Q., Lane, C. & Liu, H. (2014). An Effective Method for Detecting Potential Woodland Vernal Pools Using High-Resolution LiDAR Data and Aerial Imagery. *Remote Sensing*, 6(11): 11444-11467. doi: 10.3390/rs61111444.
165. Young, J.S., Ammon, E.M., Weisberg, P.J., Dilts, T.E., Newton, W.E., Wong-Kone, D.C. & Heki, L.G. (2013). Comparison of bird community indices for riparian restoration planning and monitoring. *Ecological Indicators*, 34: 159-167. doi: 10.1016/j.ecolind.2013.05.004.
166. Zabihi, K., Driese, K.L., Paige, G.B. & Hild, A.K. (2019). Application of Ground-Based Lidar and Gap Intercept Measurements to Quantify a Shrub Configuration Metric within Greater Sage-Grouse Nesting Habitat. *Western North American Naturalist*, 79(4): 500-514. doi: 10.3398/064.079.0404.
167. Zellweger, F., Braunisch, V., Baltensweiler, A. & Bollmann, K. (2013). Remotely sensed forest structural complexity predicts multi species occurrence at the landscape scale. *Forest Ecology and Management*, 307: 303-312. doi: 10.1016/j.foreco.2013.07.023.
168. Zellweger, F., Morsdorf, F., Purves, R.S., Braunisch, V. & Bollmann, K. (2014). Improved methods for measuring forest landscape structure: LiDAR complements field-based habitat assessment. *Biodiversity and Conservation*, 23(2): 289-307. doi: 10.1007/s10531-013-0600-7.
169. Zellweger, F., Braunisch, V., Morsdorf, F., Baltensweiler, A., Abegg, M., Roth, T., Bugmann, H. & Bollmann, K. (2015). Disentangling the effects of climate, topography, soil and vegetation on stand-scale species richness in temperate forests. *Forest Ecology and Management*, 349: 36-44. doi: 10.1016/j.foreco.2015.04.008.
170. Zellweger, F., Baltensweiler, A., Ginzler, C., Roth, T., Braunisch, V., Bugmann, H. & Bollmann, K. (2016). Environmental predictors of species richness in forest landscapes: abiotic factors versus vegetation structure. *Journal of Biogeography*, 43(6): 1080-1090. doi: 10.1111/jbi.12696.
171. Zellweger, F., Roth, T., Bugmann, H. & Bollmann, K. (2017). Beta diversity of plants, birds and butterflies is closely associated with climate and habitat structure. *Global Ecology and Biogeography*, 26(8): 898-906. doi: 10.1111/geb.12598.
172. Zhao, F., Sweitzer, R.A., Guo, Q. & Kelly, M. (2012). Characterizing habitats associated with fisher den structures in the Southern Sierra Nevada, California using discrete return lidar. *Forest Ecology and Management*, 280: 112-119. doi: 10.1016/j.foreco.2012.06.005.
173. Zielewska-Buettner, K., Heurich, M., Mueller, J. & Braunisch, V. (2018). Remotely Sensed Single Tree Data Enable the Determination of Habitat Thresholds for the Three-Toed Woodpecker (*Picoides tridactylus*). *Remote Sensing*, 10(12): 1972. doi: 10.3390/rs10121972.
